# Supplementary material
Source: publisher site journal article supplement (https://www.dovepress.com/article/298032)
Supplement: Supplementary file 1 [file get_supplementary_file.php]

# Supplementary material for:

Umeclidinium/vilanterol compared with fluticasone propionate/salmeterol, budesonide/formoterol, and tiotropium as initial maintenance therapy in patients with COPD who have high costs and comorbidities

Ravi Kalhan, David Slade, Riju Ray, Chad Moretz, Guillaume Germain, François Laliberté, Qin Shen, Mei Sheng Duh, Sean Dale MacKnight, Beth Hahn

## Table S1. ICD-9/10-CM diagnostic codes for COPD and COPD exacerbations

|  | **Description** | **COPD** | **COPD exacerbation** |
| --- | --- | --- | --- |
| **ICD-9-CM** |  |  |  |
| 466 | Acute bronchitis |  | X |
| 490 | Bronchitis, not specified as acute or chronic |  | X |
| 491 | Chronic bronchitis | X | X |
| 491.0 | Simple chronic bronchitis | X | X |
| 491.1 | Mucopurulent chronic bronchitis | X | X |
| 491.20 | Obstructive chronic bronchitis, without exacerbation | X | X |
| 491.21 | Obstructive chronic bronchitis, with (acute) exacerbation | X | X |
| 491.22 | Obstructive chronic bronchitis with acute bronchitis | X | X |
| 491.8 | Other chronic bronchitis | X | X |
| 491.9 | Unspecified chronic bronchitis | X | X |
| 492 | Emphysema | X | X |
| 492.0 | Emphysematous bleb | X | X |
| 492.8 | Other emphysema | X | X |
| 493.00 | Extrinsic asthma, unspecified |  | X |
| 493.01 | Extrinsic asthma with status asthmaticus |  | X |
| 493.02 | Extrinsic asthma, with (acute) exacerbation |  | X |
| 493.11 | Intrinsic asthma with status asthmaticus |  | X |
| 493.12 | Intrinsic asthma, with (acute) exacerbation |  | X |
| 493.21 | Chronic obstructive asthma with status asthmaticus |  | X |
| 493.22 | Chronic obstructive asthma, with (acute) exacerbation |  | X |
| 493.90 | Asthma, unspecified, unspecified status |  | X |
| 493.91 | Asthma, unspecified with status asthmaticus |  | X |
| 493.92 | Asthma, unspecified, with (acute) exacerbation |  | X |
| 494.1 | Bronchiectasis with acute exacerbation |  | X |
| 496 | Chronic airway obstruction, not elsewhere classified | X | X |
| 518.81 | Acute respiratory failure |  | X |
| 518.82 | Other pulmonary insufficiency, not elsewhere classified |  | X |
| 518.84 | Acute and chronic respiratory failure |  | X |
| 799.1 | Respiratory arrest |  | X |
| **ICD-10-CM** |  |  |  |
| J20 | Acute bronchitis |  | X |
| J20.0 | Acute bronchitis due to Mycoplasma pneumoniae |  | X |
| J20.1 | Acute bronchitis due to Hemophilus influenzae |  | X |
| J20.2 | Acute bronchitis due to streptococcus |  | X |
| J20.3 | Acute bronchitis due to coxsackievirus |  | X |
| J20.4 | Acute bronchitis due to parainfluenza virus |  | X |
| J20.5 | Acute bronchitis due to respiratory syncytial virus |  | X |
| J20.6 | Acute bronchitis due to rhinovirus |  | X |
| J20.7 | Acute bronchitis due to echovirus |  | X |
| J20.8 | Acute bronchitis due to other specified organisms |  | X |
| J20.9 | Acute bronchitis, unspecified |  | X |
| J40 | Bronchitis, not specified as acute or chronic |  | X |
| J41 | Simple and mucopurulent chronic bronchitis | X | X |
| J41.0 | Simple chronic bronchitis | X | X |
| J41.1 | Mucopurulent chronic bronchitis | X | X |
| J41.8 | Mixed simple and mucopurulent chronic bronchitis | X | X |
| J42 | Unspecified chronic bronchitis | X | X |
| J43 | Emphysema | X | X |
| J43.0 | Unilateral pulmonary emphysema (MacLeod's syndrome) | X | X |
| J43.1 | Panlobular emphysema | X | X |
| J43.2 | Centrilobular emphysema | X | X |
| J43.8 | Other emphysema | X | X |
| J43.9 | Emphysema, unspecified | X | X |
| J44 | Other chronic obstructive pulmonary disease | X | X |
| J44.0 | Chronic obstructive pulmonary disease with acute lower respiratory infection | X | X |
| J44.1 | Chronic obstructive pulmonary disease with (acute) exacerbation | X | X |
| J44.9 | Chronic obstructive pulmonary disease, unspecified | X | X |
| J45.20 | Mild intermittent asthma, uncomplicated |  | X |
| J45.21 | Mild intermittent asthma with (acute) exacerbation |  | X |
| J45.22 | Mild intermittent asthma with status asthmaticus |  | X |
| J45.31 | Mild persistent asthma with (acute) exacerbation |  | X |
| J45.32 | Mild persistent asthma with status asthmaticus |  | X |
| J45.41 | Moderate persistent asthma with (acute) exacerbation |  | X |
| J45.42 | Moderate persistent asthma with status asthmaticus |  | X |
| J45.51 | Severe persistent asthma with (acute) exacerbation |  | X |
| J45.52 | Severe persistent asthma with status asthmaticus |  | X |
| J45.902 | Unspecified asthma with status asthmaticus |  | X |
| J45.909 | Unspecified asthma, uncomplicated |  | X |
| J45.998 | Other asthma |  | X |
| J47.1 | Bronchiectasis with (acute) exacerbation |  | X |
| J80 | Acute respiratory distress syndrome |  | X |
| J96.0 | Acute respiratory failure |  | X |
| J96.00 | Acute respiratory failure, unspecified whether with hypoxia or hypercapnia |  | X |
| J96.01 | Acute respiratory failure with hypoxia |  | X |
| J96.02 | Acute respiratory failure with hypercapnia |  | X |
| J96.2 | Acute and chronic respiratory failure |  | X |
| J96.20 | Acute and chronic respiratory failure, unspecified whether with hypoxia or hypercapnia |  | X |
| J96.21 | Acute and chronic respiratory failure with hypoxia |  | X |
| J96.22 | Acute and chronic respiratory failure with hypercapnia |  | X |
| J96.9 | Respiratory failure, unspecified |  | X |
| J96.90 | Respiratory failure, unspecified, unspecified whether with hypoxia or hypercapnia |  | X |
| J96.91 | Respiratory failure, unspecified with hypoxia |  | X |
| J96.92 | Respiratory failure, unspecified with hypercapnia |  | X |
| R09.2 | Respiratory arrest |  | X |

ICD, International Statistical Classification of Diseases and Related Health Problems; 9-CM, 9th Edition Clinical Modification; 10-CM, 10th Edition Clinical Modification

## Table S2. Pre-index patient characteristics for UMEC/VI versus FP/SAL, B/F, and TIO unmatched cohorts

| **Characteristics** | **UMEC/VI**  **(N=1505)** | **UMEC/VI vs FP/SAL** | | **UMEC/VI vs B/F** | | **UMEC/VI vs TIO** | |
| --- | --- | --- | --- | --- | --- | --- | --- |
| **FP/SAL**  **(N=3385)** | **Std diff**  **(%)** | **B/F**  **(N=3470)** | **Std. diff**  **(%)** | **TIO**  **(N=4089)** | **Std diff**  **(%)** |
| Post-index eligibility period, days, mean (SD) | 358.8 (288.9) | 531.5 (450.4) | 45.6 | 473.3 (415.6) | 32.0 | 544.0 (460.4) | 48.2 |
| On-treatment follow-up period, days, mean (SD) | 138.1 (174.7) | 123.1 (196.5) | 8.0 | 109.7 (169.7) | 16.5 | 158.1 (236.2) | 9.7 |
| Age, years, mean (SD) | 71.8 (9.5) | 73.0 (9.9) | 12.1 | 72.3 (9.6) | 5.2 | 73.0 (9.3) | 11.9 |
| Female, n (%) | 681 (45.2) | 1600 (47.3) | 4.0 | 1572 (45.3) | 0.1 | 1828 (44.7) | 1.1 |
| Region, n (%) |  |  |  |  |  |  |  |
| South | 861 (57.2) | 1466 (43.3) | 27.8 | 1747 (50.3) | 13.8 | 1670 (40.8) | 32.7 |
| West | 171 (11.4) | 725 (21.4) | 27.2 | 469 (13.5) | 6.5 | 913 (22.3) | 29.3 |
| Midwest | 341 (22.7) | 769 (22.7) | 0.1 | 858 (24.7) | 4.9 | 974 (23.8) | 2.8 |
| Northeast | 131 (8.7) | 415 (12.3) | 11.6 | 384 (11.1) | 7.9 | 522 (12.8) | 13.1 |
| Unknown | 1 (0.1) | 10 (0.3) | 5.4 | 12 (0.3) | 6.2 | 10 (0.2) | 4.5 |
| Insurance plan type, n (%) |  |  |  |  |  |  |  |
| Medicare | 1249 (83.0) | 2997 (88.5) | 15.9 | 3067 (88.4) | 15.4 | 3561 (87.1) | 11.5 |
| Commercial | 256 (17.0) | 388 (11.5) | 15.9 | 403 (11.6) | 15.4 | 528 (12.9) | 11.5 |
| Quan-CCI, mean (SD) | 6.1 (2.5) | 6.2 (2.5) | 4.4 | 6.2 (2.5) | 3.4 | 6.1 (2.5) | 0.7 |
| Number of COPD-related exacerbations, mean (SD) |  |  |  |  |  |  |  |
| Overall | 0.86 (0.99) | 0.93 (1.04) | 7.4 | 1.00 (1.11) | 13.1 | 0.89 (1.04) | 3.0 |
| Moderate | 0.36 (0.68) | 0.28 (0.63) | 12.7 | 0.36 (0.73) | 0.1 | 0.28 (0.65) | 11.5 |
| Severe | 0.50 (0.71) | 0.66 (0.81) | 20.9 | 0.64 (0.82) | 18.0 | 0.61 (0.77) | 14.4 |
| Patients with COPD-related exacerbations, n (%) |  |  |  |  |  |  |  |
| Overall | 848 (56.3) | 2055 (60.7) | 8.9 | 2156 (62.1) | 11.8 | 2373 (58.0) | 3.4 |
| Moderate | 246 (16.3) | 374 (11.0) | 15.4 | 499 (14.4) | 5.4 | 459 (11.2) | 14.9 |
| Severe | 602 (40.0) | 1681 (49.7) | 19.4 | 1657 (47.8) | 15.6 | 1914 (46.8) | 13.7 |
| Respiratory medications, n (%) |  |  |  |  |  |  |  |
| Systemic corticosteroids | 934 (62.1) | 1900 (56.1) | 12.1 | 2114 (60.9) | 2.3 | 2218 (54.2) | 15.8 |
| SABA | 649 (43.1) | 1197 (35.4) | 15.9 | 1341 (38.6) | 9.1 | 1417 (34.7) | 17.4 |
| SAMA/SABA | 229 (15.2) | 576 (17.0) | 4.9 | 579 (16.7) | 4.0 | 548 (13.4) | 5.2 |
| Montelukast | 73 (4.9) | 128 (3.8) | 5.3 | 170 (4.9) | 0.2 | 132 (3.2) | 8.2 |
| SAMA | 47 (3.1) | 93 (2.7) | 2.2 | 90 (2.6) | 3.2 | 82 (2.0) | 7.1 |
| Methylxanthines | 5 (0.3) | 17 (0.5) | 2.6 | 11 (0.3) | 0.3 | 16 (0.4) | 1.0 |
| Chronic antibiotic (≥6 months of continuous use) | 7 (0.5) | 32 (0.9) | 5.7 | 24 (0.7) | 3.0 | 26 (0.6) | 2.3 |
| N-acetylcysteine | 2 (0.1) | 10 (0.3) | 3.5 | 8 (0.2) | 2.3 | 13 (0.3) | 3.9 |
| PDE-4 inhibitor | 1 (0.1) | 7 (0.2) | 3.8 | 3 (0.1) | 0.7 | 9 (0.2) | 4.1 |
| COPD-related HCRUa, mean (SD) |  |  |  |  |  |  |  |
| Hospitalizations | 0.86 (1.12) | 1.22 (1.20) | 31.3 | 1.13 (1.22) | 23.2 | 1.15 (1.20) | 25.1 |
| ER visits | 0.62 (1.59) | 0.80 (1.84) | 10.3 | 0.82 (1.88) | 11.5 | 0.82 (1.97) | 11.3 |
| Outpatient visits | 6.4 (12.7) | 5.1 (11.4) | 10.3 | 6.2 (13.5) | 1.9 | 5.5 (12.4) | 7.1 |
| Other visitsb | 1.9 (5.0) | 2.8 (8.7) | 12.7 | 2.1 (5.3) | 3.8 | 2.4 (6.3) | 8.0 |
| Medical costsc, $, mean (SD) |  |  |  |  |  |  |  |
| COPD-related total | 41 651 (53 630) | 54 726 (71 356) | 20.7 | 50 157 (63 219) | 14.5 | 53 490 (70 954) | 18.8 |
| Hospitalizations | 29 169 (47 972) | 42 390 (66 031) | 22.9 | 37 484 (54 996) | 16.1 | 40 008 (64 486) | 19.1 |
| ER visits | 4002 (13 857) | 5895 (22 853) | 10.0 | 5759 (24 327) | 8.9 | 5859 (21 374) | 10.3 |
| Outpatient visits | 7962 (20 330) | 5773 (17 902) | 11.4 | 6470 (22 145) | 7.0 | 7072 (24 056) | 4.0 |
| Other visitsb | 519 (5230) | 668 (3424) | 3.4 | 444 (2463) | 1.8 | 551 (3219) | 0.7 |
| All-cause total | 113 292  (115 795) | 118 719 (164 976) | 3.8 | 116 808 (137 362) | 2.8 | 112 009  (110 970) | 1.1 |

aCOPD-related HCRU and costs were defined as claims with a primary or secondary diagnosis of COPD. bIncluded visits such as home services and hospice. cMedical costs are inflated to 2019 US dollars using the US Medical Care consumer price index from the Bureau of Labor Statistics, US Department of Labor.

B/F, budesonide/formoterol; COPD, chronic obstructive pulmonary disease; ER, emergency room; FP/SAL, fluticasone propionate/salmeterol; HCRU, healthcare resource use; PDE-4, phosphodiesterase-4; Quan-CCI, Quan-Charlson comorbidity index; SABA, short-acting β2-agonist; SAMA, short-acting muscarinic antagonist; SD, standard deviation; Std diff, standardized difference; TIO, tiotropium; UMEC/VI, umeclidinium/vilanterol

## Table S3. Pre-index comorbidities for UMEC/VI versus FP/SAL, B/F, and TIO matched cohorts

| **Comorbidities, n (%)** | **UMEC/VI vs FP/SAL** | | | **UMEC/VI vs B/F** | | | **UMEC/VI vs TIO** | | |
| --- | --- | --- | --- | --- | --- | --- | --- | --- | --- |
| **UMEC/VI**  **(N=1194)** | **FP/SAL**  **(N=1194)** | **Std diff**  **(%)** | **UMEC/VI**  **(N=1441)** | **B/F**  **(N=1441)** | **Std diff**  **(%)** | **UMEC/VI**  **(N=1277)** | **TIO**  **(N=1277)** | **Std diff**  **(%)** |
| Chronic pulmonary disease | 1145 (95.9) | 1146 (96.0) | 0.4 | 1382 (95.9) | 1377 (95.6) | 1.7 | 1220 (95.5) | 1221 (95.6) | 0.4 |
| Hypertension | 1091 (91.4) | 1102 (92.3) | 3.4 | 1318 (91.5) | 1335 (92.6) | 4.4 | 1171 (91.7) | 1165 (91.2) | 1.7 |
| Coronary artery disease | 787 (65.9) | 771 (64.6) | 2.8 | 937 (65.0) | 955 (66.3) | 2.6 | 832 (65.2) | 844 (66.1) | 2.0 |
| Cardiac arrhythmias | 733 (61.4) | 720 (60.3) | 2.2 | 836 (58.0) | 837 (58.1) | 0.1 | 762 (59.7) | 749 (58.7) | 2.1 |
| Fluid and electrolyte disorders | 691 (57.9) | 690 (57.8) | 0.2 | 801 (55.6) | 789 (54.8) | 1.7 | 720 (56.4) | 734 (57.5) | 2.2 |
| Peripheral vascular disorders | 662 (55.4) | 637 (53.4) | 4.2 | 790 (54.8) | 784 (54.4) | 0.8 | 699 (54.7) | 710 (55.6) | 1.7 |
| Congestive heart failure | 631 (52.8) | 630 (52.8) | 0.2 | 743 (51.6) | 745 (51.7) | 0.3 | 662 (51.8) | 667 (52.2) | 0.8 |
| Diabetes | 572 (47.9) | 592 (49.6) | 3.4 | 686 (47.6) | 683 (47.4) | 0.4 | 612 (47.9) | 594 (46.5) | 2.8 |
| Substance-related and addictive disorders | 533 (44.6) | 536 (44.9) | 0.5 | 638 (44.3) | 648 (45.0) | 1.4 | 569 (44.6) | 575 (45.0) | 0.9 |
| Renal failure | 524 (43.9) | 521 (43.6) | 0.5 | 602 (41.8) | 601 (41.7) | 0.1 | 522 (40.9) | 545 (42.7) | 3.7 |
| Valvular disease | 471 (39.4) | 465 (38.9) | 1.0 | 563 (39.1) | 566 (39.3) | 0.4 | 505 (39.5) | 521 (40.8) | 2.6 |
| Sleep-wake disorders | 440 (36.9) | 452 (37.9) | 2.1 | 537 (37.3) | 558 (38.7) | 3.0 | 481 (37.7) | 474 (37.1) | 1.1 |
| Depressive disorders | 437 (36.6) | 429 (35.9) | 1.4 | 519 (36.0) | 538 (37.3) | 2.7 | 456 (35.7) | 476 (37.3) | 3.3 |
| Atrial fibrillation | 421 (35.3) | 415 (34.8) | 1.1 | 484 (33.6) | 507 (35.2) | 3.4 | 450 (35.2) | 433 (33.9) | 2.8 |
| Solid tumor without metastases | 416 (34.8) | 419 (35.1) | 0.5 | 531 (36.8) | 525 (36.4) | 0.9 | 461 (36.1) | 466 (36.5) | 0.8 |
| Anxiety disorders | 399 (33.4) | 402 (33.7) | 0.5 | 475 (33.0) | 493 (34.2) | 2.6 | 413 (32.3) | 433 (33.9) | 3.3 |
| Obesity | 350 (29.3) | 355 (29.7) | 0.9 | 421 (29.2) | 439 (30.5) | 2.7 | 362 (28.3) | 356 (27.9) | 1.0 |
| Other conditions that may require a focus of clinical attention | 343 (28.7) | 329 (27.6) | 2.6 | 400 (27.8) | 410 (28.5) | 1.5 | 354 (27.7) | 343 (26.9) | 1.9 |
| Diabetes with neuropathy | 334 (28.0) | 350 (29.3) | 3.0 | 392 (27.2) | 388 (26.9) | 0.6 | 354 (27.7) | 340 (26.6) | 2.5 |
| Hypothyroidism | 303 (25.4) | 299 (25.0) | 0.8 | 369 (25.6) | 360 (25.0) | 1.4 | 322 (25.2) | 318 (24.9) | 0.7 |
| Deficient anemias | 293 (24.5) | 305 (25.5) | 2.3 | 351 (24.4) | 360 (25.0) | 1.4 | 309 (24.2) | 303 (23.7) | 1.1 |
| Other neurological disorders | 283 (23.7) | 297 (24.9) | 2.7 | 329 (22.8) | 331 (23.0) | 0.3 | 296 (23.2) | 295 (23.1) | 0.2 |
| Pulmonary circulation disorder | 274 (22.9) | 254 (21.3) | 4.0 | 323 (22.4) | 338 (23.5) | 2.5 | 284 (22.2) | 284 (22.2) | 0.0 |
| Weight loss | 233 (19.5) | 224 (18.8) | 1.9 | 260 (18.0) | 246 (17.1) | 2.6 | 242 (19.0) | 245 (19.2) | 0.6 |
| Coagulopathy | 226 (18.9) | 226 (18.9) | 0.0 | 263 (18.3) | 263 (18.3) | 0.0 | 237 (18.6) | 226 (17.7) | 2.2 |
| Neurocognitive disorders | 204 (17.1) | 221 (18.5) | 3.7 | 231 (16.0) | 230 (16.0) | 0.2 | 212 (16.6) | 213 (16.7) | 0.2 |
| Types of cancer |  |  |  |  |  |  |  |  |  |
| Lung | 204 (17.1) | 200 (16.8) | 0.9 | 291 (20.2) | 275 (19.1) | 2.8 | 247 (19.3) | 246 (19.3) | 0.2 |
| Breast | 55 (4.6) | 60 (5.0) | 2.0 | 66 (4.6) | 73 (5.1) | 2.3 | 56 (4.4) | 42 (3.3) | 5.7 |
| Othera | 167 (14.0) | 162 (13.6) | 1.2 | 196 (13.6) | 199 (13.8) | 0.6 | 171 (13.4) | 188 (14.7) | 3.8 |
| Liver disease | 196 (16.4) | 199 (16.7) | 0.7 | 237 (16.4) | 240 (16.7) | 0.6 | 215 (16.8) | 209 (16.4) | 1.3 |
| Metastatic cancer | 162 (13.6) | 174 (14.6) | 2.9 | 209 (14.5) | 208 (14.4) | 0.2 | 186 (14.6) | 186 (14.6) | 0.0 |
| Rheumatoid arthritis/collagen vascular disease | 148 (12.4) | 147 (12.3) | 0.3 | 179 (12.4) | 184 (12.8) | 1.0 | 157 (12.3) | 153 (12.0) | 1.0 |
| Drug abuse | 118 (9.9) | 117 (9.8) | 0.3 | 133 (9.2) | 147 (10.2) | 3.3 | 120 (9.4) | 110 (8.6) | 2.7 |
| Alcohol abuse | 115 (9.6) | 112 (9.4) | 0.9 | 130 (9.0) | 127 (8.8) | 0.7 | 118 (9.2) | 116 (9.1) | 0.5 |
| Pulmonary fibrosis | 114 (9.5) | 102 (8.5) | 3.5 | 140 (9.7) | 142 (9.9) | -0.5 | 132 (10.3) | 121 (9.5) | 2.9 |
| Blood loss anemia | 93 (7.8) | 93 (7.8) | 0.0 | 106 (7.4) | 111 (7.7) | 1.3 | 91 (7.1) | 99 (7.8) | 2.4 |
| Liver cirrhosis | 92 (7.7) | 89 (7.5) | 0.9 | 107 (7.4) | 112 (7.8) | -1.3 | 97 (7.6) | 92 (7.2) | 1.5 |
| Elimination disorders | 63 (5.3) | 67 (5.6) | 1.5 | 68 (4.7) | 72 (5.0) | 1.3 | 67 (5.2) | 68 (5.3) | 0.3 |
| Trauma and stressor related disorders | 58 (4.9) | 67 (5.6) | 3.4 | 69 (4.8) | 66 (4.6) | 1.0 | 61 (4.8) | 72 (5.6) | 3.9 |
| Peptic ulcer disease | 59 (4.9) | 60 (5.0) | 0.4 | 69 (4.8) | 70 (4.9) | 0.3 | 57 (4.5) | 55 (4.3) | 0.8 |

aIncluded kidney, endometrial, prostate, stomach colonic, genitourinary, gynecologic, brain, bladder, testicular, and renal cancer. Table includes data for comorbidities occurring in ≥5% of patients.

B/F, budesonide/formoterol; COPD, chronic obstructive pulmonary disease; FP/SAL, fluticasone propionate/salmeterol; SD, standard deviation; Std diff, standardized difference; TIO, tiotropium; UMEC/VI, umeclidinium/vilanterol

## Table S4. Pre-index comorbidities for UMEC/VI versus FP/SAL, B/F, and TIO unmatched cohorts

| **Comorbidities** | **UMEC/VI**  **(N=1505)** | **UMEC/VI vs FP/SAL** | | **UMEC/VI vs B/F** | | **UMEC/VI vs TIO** | |
| --- | --- | --- | --- | --- | --- | --- | --- |
| **FP/SAL**  **(N=3385)** | **Std diff**  **(%)** | **B/F**  **(N=3470)** | **Std diff**  **(%)** | **TIO**  **(N=4089)** | **Std diff**  **(%)** |
| Chronic pulmonary disease | 1438 (95.5) | 3286 (97.1) | 8.1 | 3355 (96.7) | 5.9 | 3922 (95.9) | 1.8 |
| Hypertension | 1369 (91.0) | 3148 (93.0) | 7.5 | 3242 (93.4) | 9.2 | 3753 (91.8) | 2.9 |
| Coronary artery disease | 972 (64.6) | 2153 (63.6) | 2.0 | 2306 (66.5) | 3.9 | 2674 (65.4) | 1.7 |
| Peripheral vascular disorders | 818 (54.4) | 1769 (52.3) | 4.2 | 1888 (54.4) | 0.1 | 2285 (55.9) | 3.1 |
| Cardiac arrhythmias | 871 (57.9) | 2127 (62.8) | 10.1 | 2080 (59.9) | 4.2 | 2585 (63.2) | 10.9 |
| Fluid and electrolyte disorders | 824 (54.8) | 2040 (60.3) | 11.2 | 2052 (59.1) | 8.9 | 2416 (59.1) | 8.8 |
| Congestive heart failure | 761 (50.6) | 1975 (58.3) | 15.6 | 1998 (57.6) | 14.1 | 2352 (57.5) | 14.0 |
| Diabetes | 708 (47.0) | 1740 (51.4) | 8.7 | 1794 (51.7) | 9.3 | 1926 (47.1) | 0.1 |
| Substance-related and addictive disorders | 668 (44.4) | 1425 (42.1) | 4.6 | 1540 (44.4) | 0.0 | 1802 (44.1) | 0.6 |
| Renal failure | 626 (41.6) | 1532 (45.3) | 7.4 | 1488 (42.9) | 2.6 | 1660 (40.6) | 2.0 |
| Valvular disease | 577 (38.3) | 1327 (39.2) | 1.8 | 1429 (41.2) | 5.8 | 1681 (41.1) | 5.7 |
| Solid tumor without metastases | 573 (38.1) | 1035 (30.6) | 15.8 | 1070 (30.8) | 15.2 | 1305 (31.9) | 12.9 |
| Sleep-wake disorders | 560 (37.2) | 1128 (33.3) | 8.1 | 1235 (35.6) | 3.4 | 1411 (34.5) | 5.6 |
| Depressive disorders | 542 (36.0) | 1218 (36.0) | 0.1 | 1218 (35.1) | 1.9 | 1468 (35.9) | 0.2 |
| Atrial fibrillation | 502 (33.4) | 1238 (36.6) | 6.7 | 1212 (34.9) | 3.3 | 1580 (38.6) | 11.0 |
| Anxiety disorders | 491 (32.6) | 1052 (31.1) | 3.3 | 1148 (33.1) | 1.0 | 1213 (29.7) | 6.4 |
| Obesity | 435 (28.9) | 869 (25.7) | 7.3 | 1030 (29.7) | 1.7 | 1034 (25.3) | 8.1 |
| Other conditions that may require a focus of clinical attention | 414 (27.5) | 884 (26.1) | 3.1 | 994 (28.6) | 2.5 | 1104 (27.0) | 1.1 |
| Diabetes with neuropathy | 400 (26.6) | 900 (26.6) | 0.0 | 997 (28.7) | 4.8 | 938 (22.9) | 8.4 |
| Hypothyroidism | 380 (25.2) | 888 (26.2) | 2.3 | 938 (27.0) | 4.1 | 1058 (25.9) | 1.4 |
| Deficient anemias | 366 (24.3) | 827 (24.4) | 0.3 | 818 (23.6) | 1.7 | 943 (23.1) | 3.0 |
| Pulmonary circulation disorder | 334 (22.2) | 831 (24.5) | 5.6 | 846 (24.4) | 5.2 | 979 (23.9) | 4.2 |
| Other neurological disorders | 334 (22.2) | 939 (27.7) | 12.8 | 888 (25.6) | 8.0 | 1065 (26.0) | 9.0 |
| Types of cancer |  |  |  |  |  |  |  |
| Lung | 320 (21.3) | 436 (12.9) | 22.3 | 478 (13.8) | 19.7 | 603 (14.7) | 17.0 |
| Othera | 218 (14.5) | 420 (12.4) | 6.1 | 419 (12.1) | 7.1 | 534 (13.1) | 4.1 |
| Coagulopathy | 273 (18.1) | 617 (18.2) | 0.2 | 628 (18.1) | 0.1 | 726 (17.8) | 1.0 |
| Weight loss | 269 (17.9) | 716 (21.2) | 8.3 | 700 (20.2) | 5.9 | 889 (21.7) | 9.7 |
| Liver disease | 242 (16.1) | 571 (16.9) | 2.1 | 611 (17.6) | 4.1 | 720 (17.6) | 4.1 |
| Neurocognitive disorders | 237 (15.7) | 813 (24.0) | 20.7 | 704 (20.3) | 11.8 | 921 (22.5) | 17.2 |
| Metastatic cancer | 229 (15.2) | 415 (12.3) | 8.6 | 415 (12.0) | 9.5 | 494 (12.1) | 9.1 |
| Rheumatoid arthritis/collagen vascular disease | 186 (12.4) | 356 (10.5) | 5.8 | 420 (12.1) | 0.8 | 464 (11.3) | 3.1 |
| Pulmonary fibrosis | 148 (9.8) | 283 (8.4) | 5.1 | 305 (8.8) | 3.6 | 387 (9.5) | 1.3 |
| Drug abuse | 135 (9.0) | 327 (9.7) | 2.4 | 358 (10.3) | 4.6 | 360 (8.8) | 0.6 |
| Alcohol abuse | 135 (9.0) | 312 (9.2) | 0.9 | 312 (9.0) | 0.1 | 399 (9.8) | 2.7 |
| Liver cirrhosis | 111 (7.4) | 264 (7.8) | 1.6 | 274 (7.9) | 2.0 | 335 (8.2) | 3.1 |
| Blood loss anemia | 110 (7.3) | 242 (7.1) | 0.6 | 235 (6.8) | 2.1 | 280 (6.8) | 1.8 |
| Trauma and stressor related disorders | 72 (4.8) | 203 (6.0) | 5.4 | 196 (5.6) | 3.9 | 226 (5.5) | 3.4 |
| Peptic ulcer disease | 71 (4.7) | 202 (6.0) | 5.6 | 188 (5.4) | 3.2 | 199 (4.9) | 0.7 |
| Elimination disorders | 70 (4.7) | 239 (7.1) | 10.3 | 236 (6.8) | 9.3 | 278 (6.8) | 9.2 |
| Paralysis | 63 (4.2) | 181 (5.3) | 5.4 | 185 (5.3) | 5.4 | 204 (5.0) | 3.8 |
| Gastric/duodenal ulcers | 58 (3.9) | 170 (5.0) | 5.7 | 163 (4.7) | 4.2 | 192 (4.7) | 4.2 |
| Schizophrenia spectrum and other psychotic disorders | 49 (3.3) | 244 (7.2) | 17.8 | 182 (5.2) | 9.9 | 277 (6.8) | 16.1 |

aIncluded kidney, endometrial, prostate, stomach colonic, genitourinary, gynecologic, brain, bladder, testicular, and renal cancer. Table includes data for comorbidities occurring in ≥5% of patients.

B/F, budesonide/formoterol; COPD, chronic obstructive pulmonary disease; COTE, COPD-specific comorbidity test; FP/SAL, fluticasone propionate/salmeterol; SD, standard deviation; Std diff, standardized difference; TIO, tiotropium; UMEC/VI, umeclidinium/vilanterol

## Table S5. Time-to-first severe exacerbation during the on-treatment period for UMEC/VI versus FP/SAL, B/F, and TIO matched cohorts

| **Time period after index date** | **Survival function**  **(Kaplan–Meier estimates), %** | | **Hazard ratio**  **(95% CI)** | ***P*** |
| --- | --- | --- | --- | --- |
| ***Treatment comparison*** | ***UMEC/VI***  ***(N=1194)*** | ***FP/SAL***  ***(N=1194)*** | **-** | **-** |
| 3 months | 10.9 | 13.4 | 0.82 (0.63, 1.08) | 0.157 |
| 6 months | 16.9 | 21.9 | 0.80 (0.63, 1.02) | 0.075 |
| 9 months | 20.7 | 30.4 | 0.76 (0.60, 0.96) | 0.021 |
| 12 months | 25.3 | 32.6 | 0.78 (0.62, 0.98) | 0.032 |
| ***Treatment comparison*** | ***UMEC/VI***  ***(N=1441)*** | ***B/F***  ***(N=1441)*** | **-** | **-** |
| 3 months | 10.4 | 13.5 | 0.74 (0.58, 0.94) | 0.014 |
| 6 months | 17.0 | 19.7 | 0.77 (0.62, 0.97) | 0.024 |
| 9 months | 22.0 | 27.0 | 0.77 (0.62, 0.95) | 0.016 |
| 12 months | 26.7 | 31.8 | 0.77 (0.63, 0.95) | 0.016 |
| ***Treatment comparison*** | ***UMEC/VI***  ***(N=1277)*** | ***TIO***  ***(N=1277)*** | **-** | **-** |
| 3 months | 10.5 | 14.5 | 0.71 (0.55, 0.91) | 0.008 |
| 6 months | 17.4 | 20.0 | 0.78 (0.62, 0.98) | 0.030 |
| 9 months | 22.7 | 24.8 | 0.79 (0.64, 0.99) | 0.039 |
| 12 months | 27.0 | 30.8 | 0.79 (0.64, 0.98) | 0.028 |

B/F, budesonide/formoterol; CI, confidence interval; COPD, chronic obstructive pulmonary disease; FP/SAL, fluticasone propionate/salmeterol; TIO, tiotropium; UMEC/VI, umeclidinium/vilanterol

## Table S6. Time-to-first moderate exacerbation during the on-treatment period for UMEC/VI versus FP/SAL, B/F, and TIO matched cohorts

| **Time period after index date** | **Survival function**  **(Kaplan–Meier estimates), %** | | **Hazard ratio**  **(95% CI)** | ***P*** |
| --- | --- | --- | --- | --- |
| ***Treatment comparison*** | ***UMEC/VI***  ***(N=1194)*** | ***FP/SAL***  ***(N=1194)*** | **-** | **-** |
| 3 months | 13.0 | 13.0 | 0.96 (0.75, 1.25) | 0.777 |
| 6 months | 23.0 | 21.3 | 1.00 (0.80, 1.26) | 0.988 |
| 9 months | 28.5 | 29.6 | 0.97 (0.78, 1.21) | 0.804 |
| 12 months | 33.2 | 38.9 | 0.94 (0.76, 1.17) | 0.605 |
| ***Treatment comparison*** | ***UMEC/VI***  ***(N=1441)*** | ***B/F***  ***(N=1441)*** | **-** | **-** |
| 3 months | 13.3 | 13.1 | 0.98 (0.78, 1.24) | 0.863 |
| 6 months | 22.3 | 20.3 | 1.01 (0.82, 1.25) | 0.900 |
| 9 months | 27.1 | 30.7 | 0.96 (0.78, 1.17) | 0.654 |
| 12 months | 32.0 | 37.4 | 0.94 (0.77, 1.15) | 0.567 |
| ***Treatment comparison*** | ***UMEC/VI***  ***(N=1277)*** | ***TIO***  ***(N=1277)*** | **-** | **-** |
| 3 months | 13.0 | 13.7 | 0.95 (0.74, 1.21) | 0.663 |
| 6 months | 23.4 | 20.0 | 1.06 (0.85, 1.31) | 0.625 |
| 9 months | 28.3 | 24.0 | 1.07 (0.87, 1.32) | 0.529 |
| 12 months | 33.0 | 31.2 | 1.05 (0.85, 1.29) | 0.658 |

B/F, budesonide/formoterol; CI, confidence interval; COPD, chronic obstructive pulmonary disease; FP/SAL, fluticasone propionate/salmeterol; TIO, tiotropium; UMEC/VI, umeclidinium/vilanterol

## Table S7. Time-to-first overall exacerbation during the on-treatment period for UMEC/VI versus FP/SAL, B/F, and TIO matched cohorts

| **Time period after index date** | **Survival function**  **(Kaplan–Meier estimates), %** | | **Hazard ratio**  **(95% CI)** | ***P-*value** |
| --- | --- | --- | --- | --- |
| ***Treatment comparison*** | ***UMEC/VI***  ***(N=1194)*** | ***FP/SAL***  ***(N=1194)*** | **-** | **-** |
| 3 months | 22.7 | 25.0 | 0.89 (0.74, 1.08) | 0.240 |
| 6 months | 35.7 | 39.1 | 0.89 (0.75, 1.06) | 0.204 |
| 9 months | 41.5 | 48.7 | 0.87 (0.74, 1.03) | 0.106 |
| 12 months | 46.2 | 55.7 | 0.86 (0.73, 1.02) | 0.077 |
| ***Treatment comparison*** | ***UMEC/VI***  ***(N=1441)*** | ***B/F***  ***(N=1441)*** | **-** | **-** |
| 3 months | 22.5 | 24.4 | 0.87 (0.73, 1.03) | 0.112 |
| 6 months | 35.1 | 35.1 | 0.90 (0.77, 1.06) | 0.201 |
| 9 months | 42.1 | 46.9 | 0.88 (0.75, 1.02) | 0.093 |
| 12 months | 46.8 | 54.8 | 0.87 (0.75, 1.01) | 0.065 |
| ***Treatment comparison*** | ***UMEC/VI***  ***(N=1277)*** | ***TIO***  ***(N=1277)*** | **-** | **-** |
| 3 months | 22.3 | 25.8 | 0.84 (0.70, 1.00) | 0.051 |
| 6 months | 36.1 | 35.2 | 0.92 (0.78, 1.08) | 0.297 |
| 9 months | 43.5 | 42.0 | 0.93 (0.79, 1.08) | 0.344 |
| 12 months | 47.2 | 53.0 | 0.90 (0.77, 1.05) | 0.163 |

B/F, budesonide/formoterol; CI, confidence interval; COPD, chronic obstructive pulmonary disease; FP/SAL, fluticasone propionate/salmeterol; TIO, tiotropium; UMEC/VI, umeclidinium/vilanterol

## Table S8. Rate of on-treatment COPD-related overall and moderate exacerbations for UMEC/VI versus FP/SAL, B/F, and TIO matched cohorts

| **Exacerbations** | **Number of events** | | **Rate (per 100 person-days)** | | **Rate ratio (95% CI)** | ***P*** |
| --- | --- | --- | --- | --- | --- | --- |
| ***Treatment comparison*** | ***UMEC/VI***  ***(N=1194)*** | ***FP/SAL***  ***(N=1194)*** | ***UMEC/VI***  ***(N=1194)*** | ***FP/SAL***  ***(N=1194)*** | **-** | **-** |
| On-treatment period, mean (SD) | 144.9 (185.3) | 107.5 (153.0) | - | - | - | - |
| Total person-days | 173 045 | 128 367 | - | - | - | - |
| Overall | 389 | 355 | 0.22 | 0.28 | 0.81 (0.70, 0.95) | 0.004 |
| Moderate | 219 | 183 | 0.13 | 0.14 | 0.89 (0.73, 1.08) | 0.208 |
| ***Treatment comparison*** | ***UMEC/VI***  ***(N=1441)*** | ***B/F***  ***(N=1441)*** | ***UMEC/VI***  ***(N=1441)*** | ***B/F***  ***(N=1441)*** | **-** | **-** |
| On-treatment period, mean (SD) | 139.5 (176.9) | 102.5 (139.9) | - | - | - | - |
| Total person-days | 201 019 | 147 676 | - | - | - | - |
| Overall | 472 | 439 | 0.23 | 0.30 | 0.79 (0.68, 0.93) | <0.001 |
| Moderate | 269 | 236 | 0.13 | 0.16 | 0.84 (0.69, 1.04) | 0.100 |
| ***Treatment comparison*** | ***UMEC/VI***  ***(N=1277)*** | ***TIO***  ***(N=1277)*** | ***UMEC/VI***  ***(N=1277)*** | ***TIO***  ***(N=1277)*** | **-** | **-** |
| On-treatment period, mean (SD) | 143.2 (183.3) | 130.3 (167.5) | - | - | - | - |
| Total person-days | 182 822 | 166 413 | - | - | - | - |
| Overall | 430 | 430 | 0.24 | 0.26 | 0.91 (0.79, 1.06) | 0.244 |
| Moderate | 244 | 225 | 0.13 | 0.14 | 0.99 (0.81, 1.22) | 0.866 |

B/F, budesonide/formoterol; CI, confidence interval; COPD, chronic obstructive pulmonary disease; FP/SAL, fluticasone propionate/salmeterol; TIO, tiotropium; UMEC/VI, umeclidinium/vilanterol
